# Supplementary material
Source: Royal Society of Chemistry journal article supplement (doi:10.1039/d6nr00737f)
Supplement: d6nr00737f1.pdf [file d6nr00737f1.pdf]

# **One-Dimensional Rough Magnetic Nanochains as Magnetically Actuated Mechano-Antibacterial Materials**

Guangyou Jia<sup>a†</sup>, Qianqian Lu<sup>b†</sup>, Yang Song<sup>b</sup>, Yuxuan Yang<sup>b</sup>, Yuanshun Li<sup>b</sup>, Yanming Ma<sup>b</sup>, Xirui Hang, Lifei Gao<sup>b</sup>, Lingkai Dong<sup>b</sup>, Wenxing Wang<sup>\*,b</sup>, Tiancong Zhao<sup>\*,b</sup>, Xiaomin Li<sup>b,c</sup>, Wei Luo<sup>\*,a</sup>

<sup>a</sup> State Key Laboratory of Advanced Fiber Materials, College of Materials Science and Engineering, Institute of Functional Materials, Donghua University, Shanghai 201620, China.

<sup>b</sup> Department of Chemistry, Shanghai Stomatological Hospital & School of Stomatology, State Key Laboratory of Molecular Engineering of Polymers, iChem, Shanghai Key Laboratory of Molecular Catalysis and Innovative Materials, Fudan University, Shanghai 200433, China.

<sup>c</sup> Shanghai Wusong Laboratory of Materials Science, Shanghai, 201999, China.

E-mail: wangwenxing@fudan.edu.cn, tczhao@fudan.edu.cn, wluo@dhu.edu.cn.

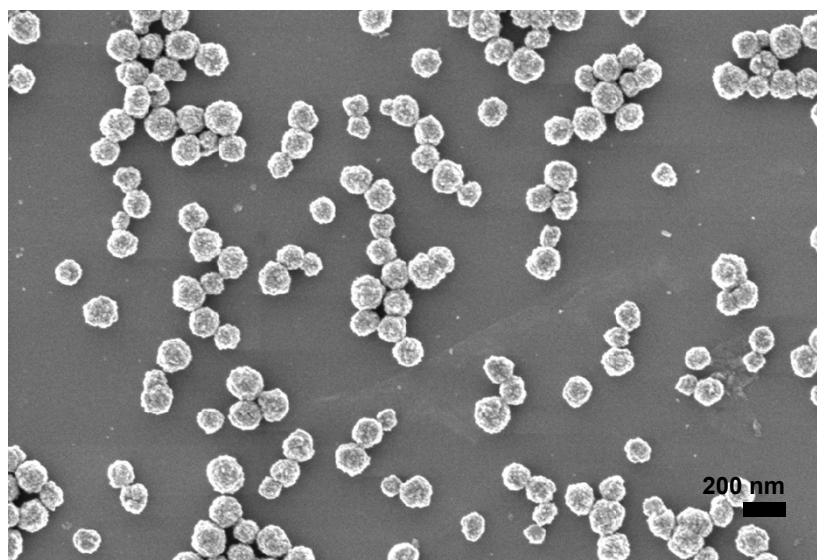

**Fig. S1** Scanning electron microscopy image (SEM) of (a)  $\text{Fe}_3\text{O}_4$ . It can be seen that  $\text{Fe}_3\text{O}_4$  nanoparticles exhibit excellent dispersion and uniformity.

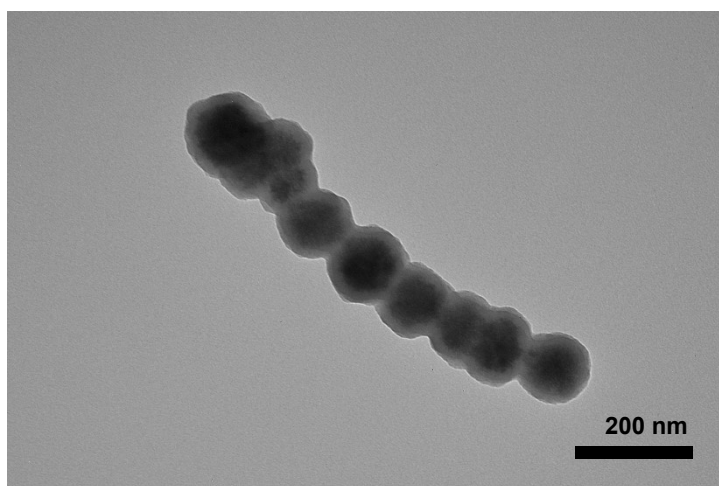

**Fig. S2** Transmission electron microscope (TEM) image of  $\text{Fe}_3\text{O}_4@\text{SiO}_2$  nanoparticles captured during the solution growth process after 12 h. It can be seen that  $\text{Fe}_3\text{O}_4@\text{SiO}_2$  nanoparticles exhibit excellent dispersion and uniformity.

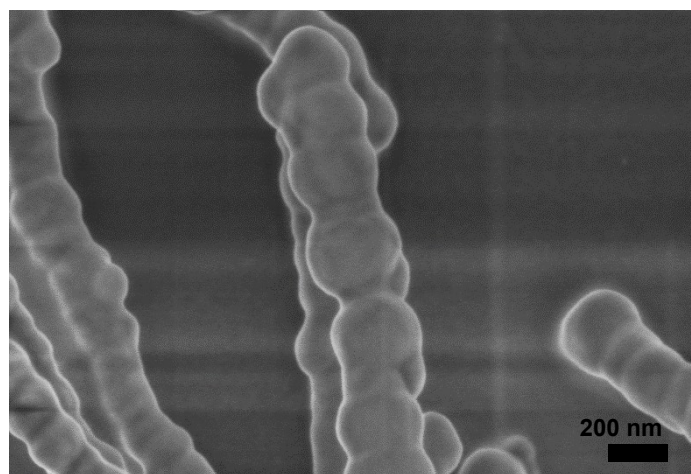

**Fig. S3** SEM image of  $\text{Fe}_3\text{O}_4@\text{SiO}_2$  nanoparticles captured after the solution reacting 12 h. It can be seen that  $\text{Fe}_3\text{O}_4@\text{SiO}_2$  nanoparticles exhibit excellent dispersion and uniformity.

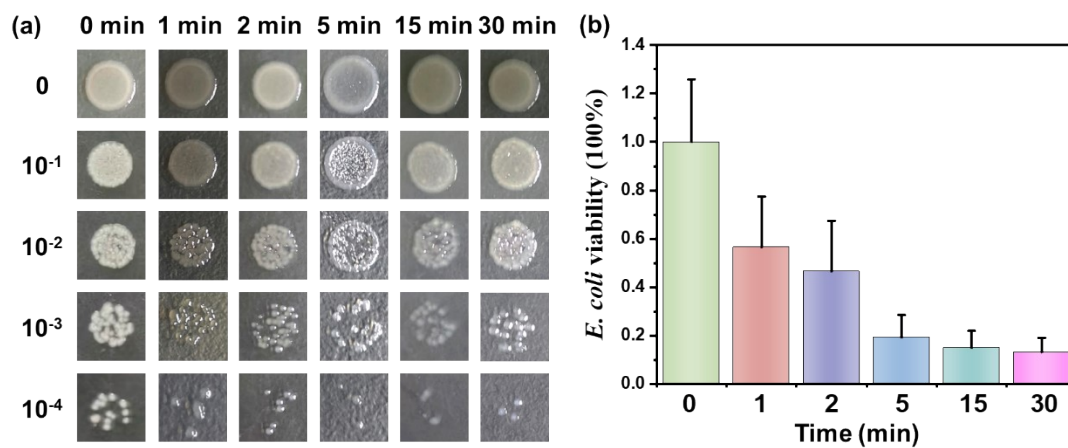

**Fig. S4** (a) Photographs of agar plates showing bacterial colonies after various time treatments at different dilution levels following 3 h incubation. (b) Quantitative analysis of bacterial survival rates corresponding to panel.

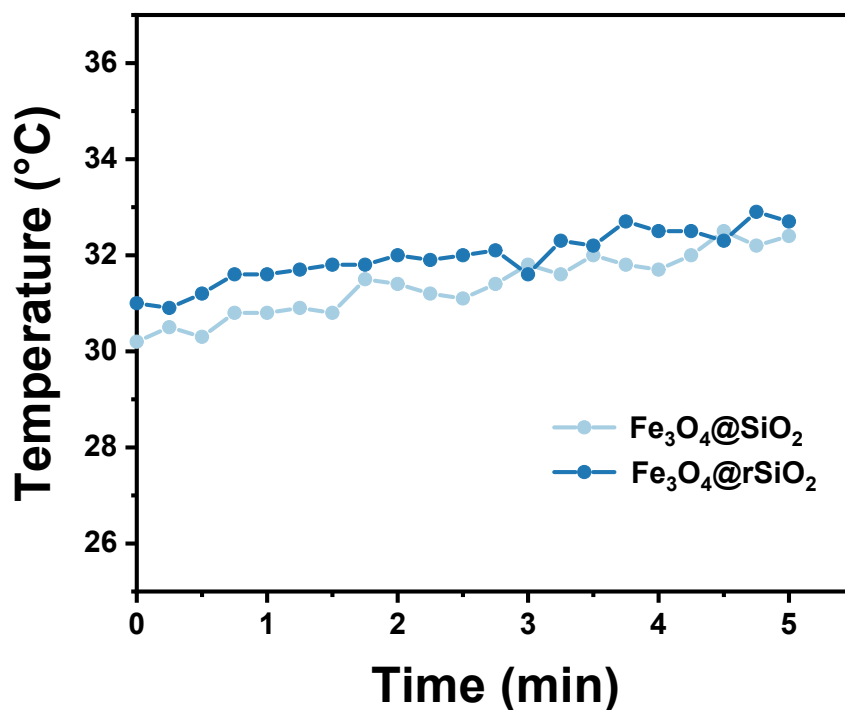

**Fig. S5** Temperature curves of contrast ( $\text{Fe}_3\text{O}_4@\text{SiO}_2$ ) and nanochains ( $\text{Fe}_3\text{O}_4@\text{rSiO}_2$ ) with 1mL PBS ( $0.1 \text{ mg mL}^{-1}$ ) under rotating magnetic field ( $14.4 \text{ A m}^{-1}$ ) for 5 min.

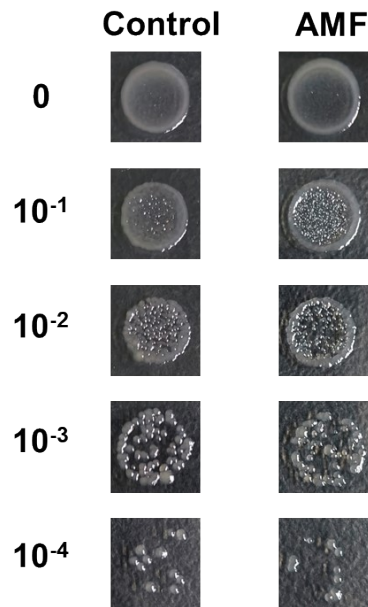

**Fig. S6** Photographs of agar plates showing bacterial colonies after various treatments at different dilution levels following 3 h incubation.

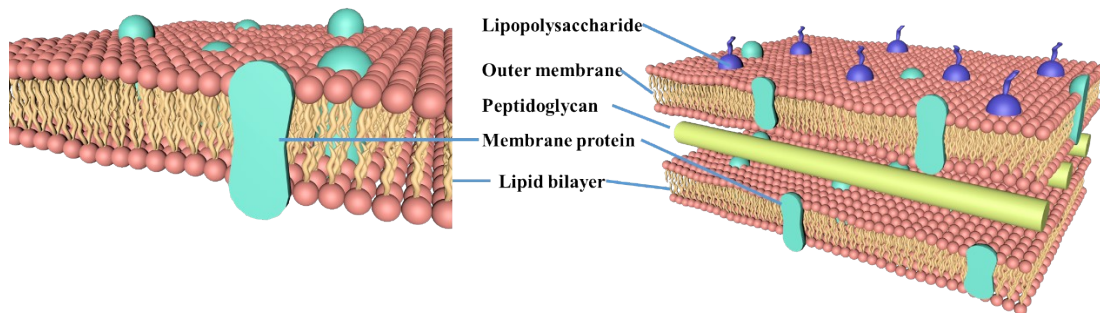

**Fig. S7** Diagram of the cell membrane (left) and the cell wall of bacteria (right).

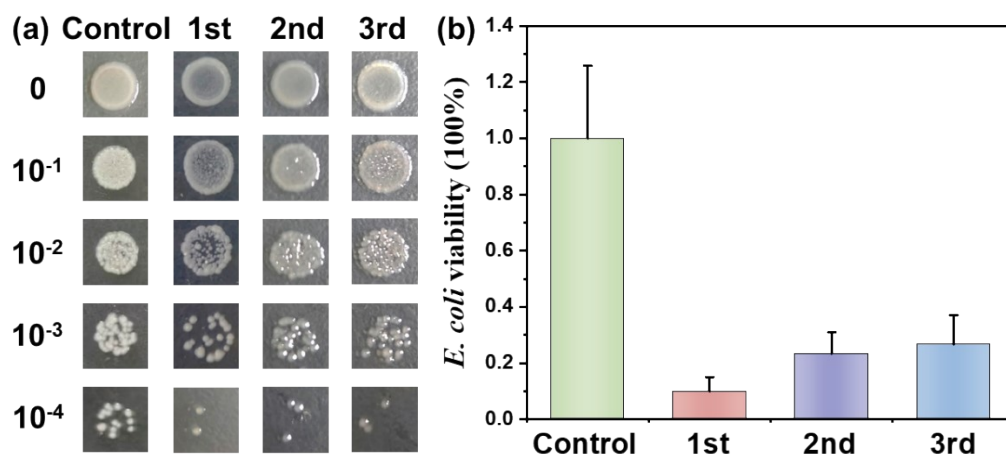

**Fig. S8** (a) Photographs of agar plates showing bacterial colonies after different numbers of cycles at different dilution levels following 3 h incubation. (b) Quantitative analysis of bacterial survival rates corresponding to panel.

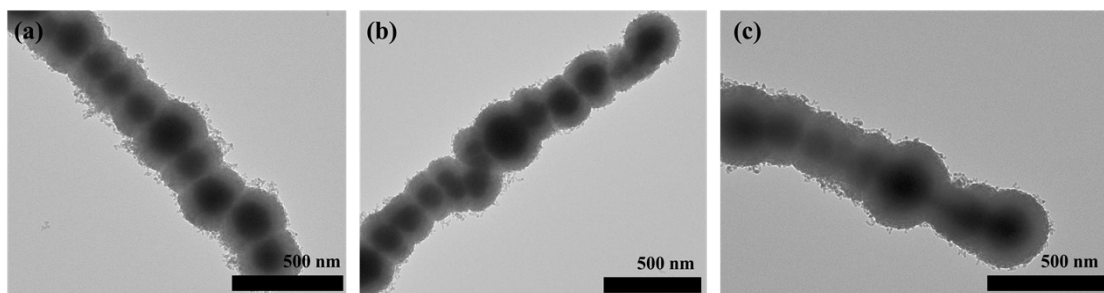

**Fig. S9** TEM images of  $\text{Fe}_3\text{O}_4@\text{rSiO}_2$  nanochains after 1st, 2nd, and 3rd cycles antibacterial treatments.

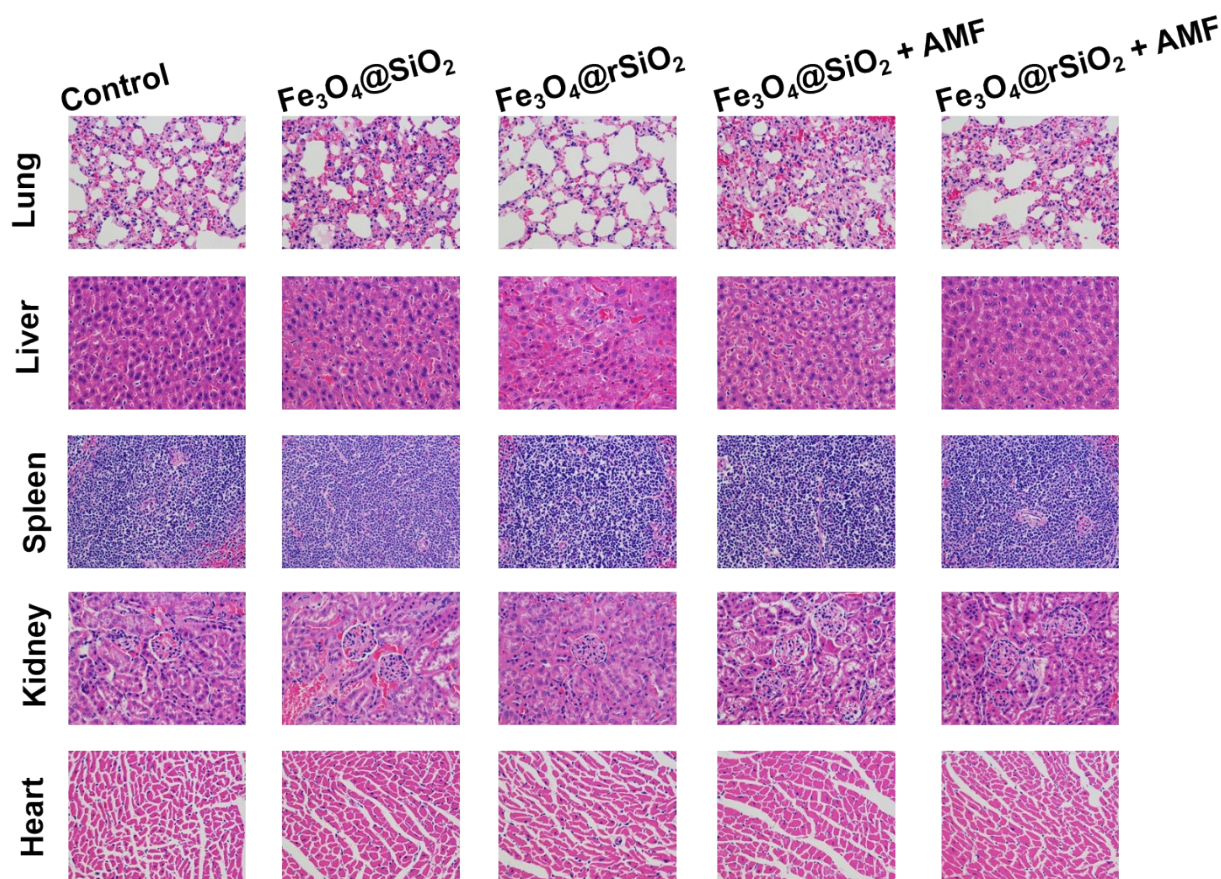

**Fig. S10** Hematoxylin and eosin staining images of visceral tissue slices of the BALB/c mice with different treatments after seven days. It is suggested that side effects on major organs are negligible. All samples exhibit no lesion or cell apoptosis after the treatments, indicating the safety of implemented treatments.

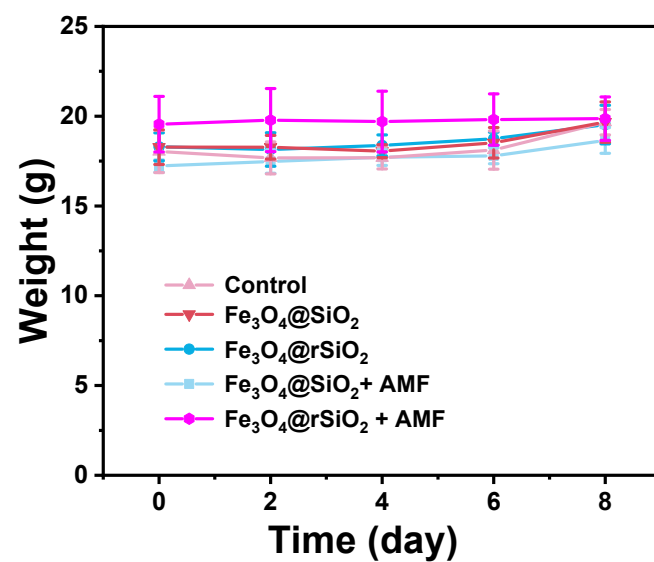

**Fig. S11** Body weight growth curves of *E. coli* infected mice during various treatments. It proves that the body weight of the mice is maintained at a normal level.
